# Supplementary material
Source: PubMed Central journal article supplement (PMC10521915)
Supplement: ehp11811.s001.acco.pdf [file ehp11811.s001.acco.pdf]

**Note to readers with disabilities:** *EHP* strives to ensure that all journal content is accessible to all readers. However, some figures and Supplemental Material published in *EHP* articles may not conform to [508 standards](#) due to the complexity of the information being presented. If you need assistance accessing journal content, please contact [ehp508@niehs.nih.gov](mailto:ehp508@niehs.nih.gov). Our staff will work with you to assess and meet your accessibility needs within 3 working days.

### **Supplemental Material**

#### **Exposure to Perfluoroalkyl Substances and Associations with Pubertal Onset and Serum Reproductive Hormones in a Longitudinal Study of Young Girls in Greater Cincinnati and the San Francisco Bay Area**

Susan M. Pinney, Cecily S. Fassler, Gayle C. Windham, Robert L. Herrick, Changchun Xie, Lawrence H. Kushi, and Frank M. Biro

#### **Table of Contents**

**Figure S1.** Number of study subjects.

**Table S1.** Inclusion Criteria.

**Table S2.** Characteristics of the girls in the puberty cohort not in this analysis and in the analysis.

**Table S3.** Pearson correlation coefficients of PFCs biomarkers levels with each other.

**Table S4.** Cox regression models of effects of PFOA serum concentration on time to pubertal event stratified by median BMI% for the girls in the study population.

**Table S5.** Logistic regression model of the effect of PFOA on the odds of entering pubarche prior to thelarche for the girls in the study.

**Table S6.** Regression model of effects of PFOA serum concentrations on hormones stratified by median BMI% for the Cincinnati girls (n=304).

Supplemental Figure S1  
Number of study subjects

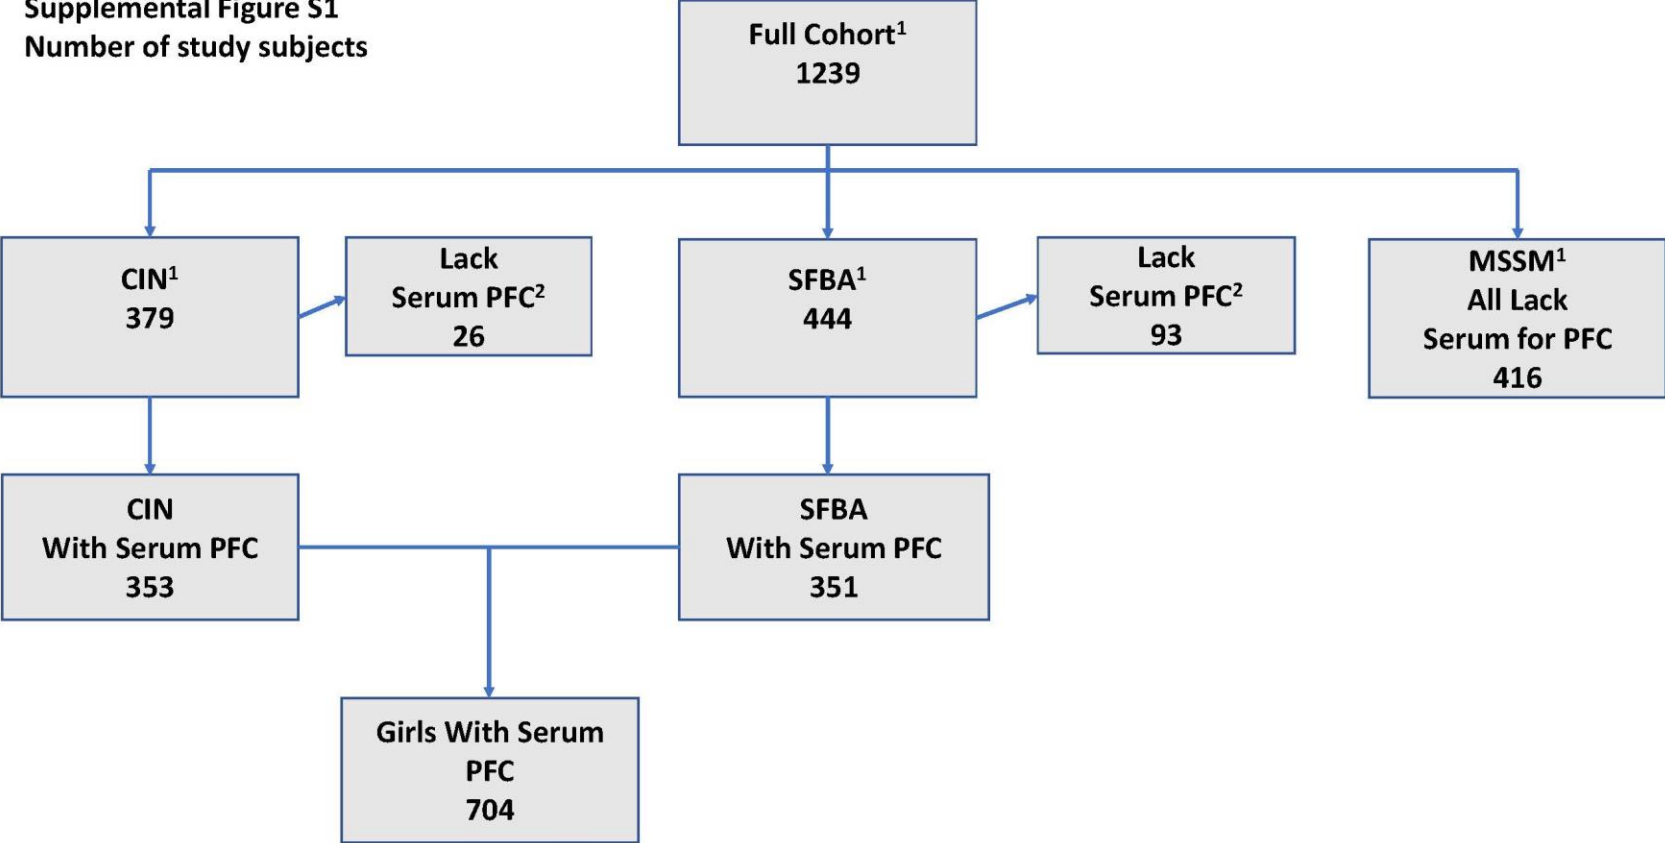

### Supplemental Table S1. Inclusion Criteria

Analysis of longitudinal association of PFOA with pubertal milestones N=704

|                    |                                                                                                                                                                      |
|--------------------|----------------------------------------------------------------------------------------------------------------------------------------------------------------------|
| Inclusion criteria |                                                                                                                                                                      |
|                    | SFBA – enrolled in clinics of the Kaiser Permanente system at San Francisco Bay area since birth and at time of study recruitment                                    |
|                    | GC – enrolled in selected public and parochial schools in Greater Cincinnati area or had a mother or grandmother in the Breast Cancer Registry of Greater Cincinnati |
|                    | Six to eight years old (calendar year, for example from 6.0 to 8.0) at time of study enrollment                                                                      |

Analysis of circulating sex hormones around the time of thelarche N=304

|                    |                                                                                                                                                                               |
|--------------------|-------------------------------------------------------------------------------------------------------------------------------------------------------------------------------|
| Inclusion criteria |                                                                                                                                                                               |
|                    | Participant in the main study                                                                                                                                                 |
|                    | Serum samples for hormone analyses (Cincinnati site only)                                                                                                                     |
|                    | At least one of four hormone measurements from at least one of four time points (6 months prior to thelarche, thelarche, 6 months after thelarche, 12 months after thelarche) |

**Supplemental Table S2. Characteristics of the girls in the puberty cohort not in this analysis and in the analysis**

|                                             | Both Sites Combined<br>Not Included(n=119) | Both Sites<br>Combined<br>Included (n=704) | p-value <sup>c</sup> |
|---------------------------------------------|--------------------------------------------|--------------------------------------------|----------------------|
| Median BMI% at baseline <sup>a</sup>        | 65.73                                      | 66.39                                      | 0.9120               |
| Mean <sup>b</sup> Age of Thelarche (months) | 107.50±17.12                               | 111.58 ± 14.57                             | 0.0536               |
| Mean <sup>b</sup> Age of Pubarche (months)  | 111.07±20.22                               | 118.63 ± 17.19                             | 0.0012               |
| Mean <sup>b</sup> Age of Menarche (months)  | 144.45±20.31                               | 147.99 ± 14.48                             | 0.3747               |
| Race/Ethnicity, n (%)                       |                                            |                                            | 0.1140               |
| White                                       | 56 (47.06%)                                | 364 (51.70%)                               |                      |
| Asian                                       | 11 (9.24%)                                 | 46 (6.53%)                                 |                      |
| Hispanic                                    | 25 (21.01%)                                | 98 (13.92%)                                |                      |
| Black                                       | 27 (22.69%)                                | 196 (27.84%)                               |                      |

<sup>a</sup>BMI% from CDC 2000 Female BMI-for-age table; height and weight at closest visit prior to pubertal event

<sup>b</sup>Mean ±standard deviation

<sup>c</sup>Test of significance of difference in values for “Both Sites Combined Not Included ” for those without PFAS measurements who were not included in the analysis (N=119) to those in the analysis, Both Sites Combined Included (N=704, Table 1); Fisher exact test for categorical variables and Kruskal-Wallis for continuous variables.

BMI=body mass index

**Supplemental Table S3: Pearson correlation coefficients<sup>a</sup> of PFCs biomarkers levels with each other**

| Analyte 1     | Analyte 2          | Both Sites Combined |                         |         | Greater Cincinnati |                         |         | SF Bay Area |                         |         |
|---------------|--------------------|---------------------|-------------------------|---------|--------------------|-------------------------|---------|-------------|-------------------------|---------|
|               |                    | N                   | Correlation Coefficient | p-value | N                  | Correlation Coefficient | p-value | N           | Correlation Coefficient | p-value |
| PFOA          | PFOS               | 704                 | 0.578                   | <.0001  | 353                | 0.616                   | <.0001  | 351         | 0.600                   | <.0001  |
| PFOA          | PFOSA              | 704                 | 0.309                   | <.0001  | 353                | 0.377                   | <.0001  | 351         | 0.173                   | 0.001   |
| PFOA          | Et-PFOSA-AcOH      | 704                 | 0.287                   | <.0001  | 353                | 0.377                   | <.0001  | 351         | 0.245                   | <.0001  |
| PFOA          | Me-PFOSA-AcOH      | 704                 | 0.335                   | <.0001  | 353                | 0.333                   | <.0001  | 351         | 0.356                   | <.0001  |
| PFOA          | PFNA               | 704                 | 0.310                   | <.0001  | 353                | 0.338                   | <.0001  | 351         | 0.537                   | <.0001  |
| PFOA          | PFHxS              | 704                 | 0.407                   | <.0001  | 353                | 0.305                   | <.0001  | 351         | 0.494                   | <.0001  |
| PFOA          | PFDeA <sup>b</sup> | 641                 | 0.428                   | <.0001  | 293                | 0.447                   | <.0001  | 348         | 0.479                   | <.0001  |
| PFOS          | PFOSA              | 704                 | 0.279                   | <.0001  | 353                | 0.310                   | <.0001  | 351         | 0.239                   | <.0001  |
| PFOS          | Et-PFOSA-AcOH      | 704                 | 0.229                   | <.0001  | 353                | 0.271                   | <.0001  | 351         | 0.182                   | 0.001   |
| PFOS          | Me-PFOSA-AcOH      | 704                 | 0.548                   | <.0001  | 353                | 0.593                   | <.0001  | 351         | 0.492                   | <.0001  |
| PFOS          | PFNA               | 704                 | 0.370                   | <.0001  | 353                | 0.423                   | <.0001  | 351         | 0.345                   | <.0001  |
| PFOS          | PFHxS              | 704                 | 0.688                   | <.0001  | 353                | 0.735                   | <.0001  | 351         | 0.692                   | <.0001  |
| PFOS          | PFDeA <sup>b</sup> | 641                 | 0.352                   | <.0001  | 293                | 0.389                   | <.0001  | 348         | 0.318                   | <.0001  |
| PFOSA         | Et-PFOSA-AcOH      | 704                 | 0.281                   | <.0001  | 353                | 0.428                   | <.0001  | 351         | 0.135                   | 0.012   |
| PFOSA         | Me-PFOSA-AcOH      | 704                 | 0.356                   | <.0001  | 353                | 0.349                   | <.0001  | 351         | 0.359                   | <.0001  |
| PFOSA         | PFNA               | 704                 | 0.088                   | 0.019   | 353                | 0.096                   | 0.072   | 351         | 0.120                   | 0.024   |
| PFOSA         | PFHxS              | 704                 | 0.099                   | 0.008   | 353                | 0.079                   | 0.139   | 351         | 0.085                   | 0.113   |
| PFOSA         | PFDeA <sup>b</sup> | 641                 | 0.047                   | 0.233   | 293                | 0.139                   | 0.017   | 348         | 0.016                   | 0.765   |
| Et-PFOSA-AcOH | Me-PFOSA-AcOH      | 704                 | 0.113                   | 0.003   | 353                | 0.139                   | 0.009   | 351         | 0.091                   | 0.088   |
| Et-PFOSA-AcOH | PFNA               | 704                 | 0.063                   | 0.093   | 353                | -0.003                  | 0.958   | 351         | 0.101                   | 0.060   |
| Et-PFOSA-AcOH | PFHxS              | 704                 | 0.092                   | 0.015   | 353                | 0.072                   | 0.178   | 351         | 0.145                   | 0.006   |
| Et-PFOSA-AcOH | PFDeA <sup>b</sup> | 641                 | 0.076                   | 0.054   | 293                | 0.066                   | 0.260   | 348         | 0.065                   | 0.227   |
| Me-PFOSA-AcOH | PFNA               | 704                 | 0.299                   | <.0001  | 353                | 0.314                   | <.0001  | 351         | 0.328                   | <.0001  |
| Me-PFOSA-AcOH | PFHxS              | 704                 | 0.257                   | <.0001  | 353                | 0.287                   | <.0001  | 351         | 0.213                   | <.0001  |
| Me-PFOSA-AcOH | PFDeA <sup>b</sup> | 641                 | 0.231                   | <.0001  | 293                | 0.301                   | <.0001  | 348         | 0.180                   | 0.001   |
| PFNA          | PFHxS              | 704                 | 0.128                   | 0.001   | 353                | 0.251                   | <.0001  | 351         | 0.141                   | 0.008   |
| PFNA          | PFDeA <sup>b</sup> | 641                 | 0.588                   | <.0001  | 293                | 0.602                   | <.0001  | 348         | 0.577                   | <.0001  |
| PFHxS         | PFDeA <sup>b</sup> | 641                 | 0.156                   | <.0001  | 293                | 0.251                   | <.0001  | 348         | 0.128                   | 0.017   |

**Notes:**

a <LOD values substituted with  $LOD/\sqrt{2}$ ; correlations calculated using log-transformed values

b PFDeA was not measured in the samples sent to CDC as part of the pilot study (N=55 for both sites) nor in the additional 30 samples from Cincinnati sent after the pilot study

**Supplemental Table S4. Cox regression models of effects of PFOA serum concentration on time to pubertal event stratified by median BMI% for the girls in the study population.**

|                                                    | Thelarche     |             |                  |                 | Pubarche      |             |                  |                 | Menarche      |             |                  |                 |
|----------------------------------------------------|---------------|-------------|------------------|-----------------|---------------|-------------|------------------|-----------------|---------------|-------------|------------------|-----------------|
| Sub cohort of girls with a BMI% < the median N=352 | BMI% < 65.73% |             |                  |                 | BMI% < 67.57% |             |                  |                 | BMI% < 67.28% |             |                  |                 |
|                                                    | n             | Hazard      | 95% CI           | p-value         | n             | Hazard      | 95% CI           | p-value         | n             | Hazard      | 95% CI           | p-value         |
| PFOA (ng/mL)                                       |               |             |                  |                 |               |             |                  |                 |               |             |                  |                 |
| Serum PFOA ≤4.9                                    | 78            | 1.00        | reference        | -               | 80            | 1.00        | reference        | -               | 72            | 1.00        | reference        | -               |
| 4.9<Serum PFOA ≤6.4                                | 80            | 0.99        | 0.71,1.37        | 0.94            | 78            | 0.85        | 0.61,1.18        | 0.33            | 83            | 0.98        | 0.7,1.38         | 0.90            |
| 6.4<Serum PFOA ≤8.55                               | 87            | 0.85        | 0.61,1.17        | 0.31            | 88            | <b>0.64</b> | <b>0.46,0.9</b>  | <b>0.01</b>     | 89            | 0.91        | 0.65,1.30        | 0.61            |
| 8.55<Serum PFOA                                    | 107           | 0.92        | 0.66,1.28        | 0.63            | 104           | <b>0.66</b> | <b>0.47,0.93</b> | <b>0.02</b>     | 105           | 1.00        | 0.70,1.43        | 1.00            |
| BMIz closest to pubertal milestone                 | 352           | <b>1.43</b> | <b>1.22,1.68</b> | <b>&lt;0.01</b> | 350           | <b>1.46</b> | <b>1.24,1.72</b> | <b>&lt;0.01</b> | 349           | <b>1.45</b> | <b>1.20,1.74</b> | <b>&lt;0.01</b> |
| Race                                               |               |             |                  |                 |               |             |                  |                 |               |             |                  |                 |
| White                                              | 207           | 1.00        | reference        | -               | 198           | 1.00        | reference        | -               | 211           | 1.00        | reference        | -               |
| Asian                                              | 31            | 1.01        | 0.68,1.51        | 0.95            | 33            | <b>0.57</b> | <b>0.38,0.87</b> | <b>0.01</b>     | 34            | 1.23        | 0.82,1.84        | 0.31            |
| Hispanic                                           | 38            | 1.10        | 0.74,1.62        | 0.65            | 41            | 0.96        | 0.65,1.42        | 0.84            | 36            | <b>1.70</b> | <b>1.13,2.56</b> | <b>0.01</b>     |
| <b>Black</b>                                       | <b>76</b>     | <b>1.59</b> | <b>1.19,2.13</b> | <b>&lt;0.01</b> | <b>78</b>     | <b>1.53</b> | <b>1.14,2.06</b> | <b>0.01</b>     | 68            | 1.36        | 0.99,1.88        | 0.06            |
| Maternal Age of Menarche                           |               |             |                  |                 |               |             |                  |                 |               |             |                  |                 |
| Before Age 12                                      |               |             |                  |                 |               |             |                  |                 | 61            | 1.26        | 0.92,1.74        | 0.16            |
| Between Age 12 and 14                              |               |             |                  |                 |               |             |                  |                 | 199           | 1.00        | reference        | -               |
| After Age 14                                       |               |             |                  |                 |               |             |                  |                 | 89            | <b>0.72</b> | <b>0.54,0.96</b> | <b>0.03</b>     |
| Site                                               |               |             |                  |                 |               |             |                  |                 |               |             |                  |                 |
| Cincinnati                                         | 177           | 1.00        | reference        | -               | 172           | 1.00        | reference        | -               | 171           | 1.00        | reference        | -               |
| San Francisco Bay Area                             | 175           | <b>0.69</b> | <b>0.54,0.89</b> | <b>&lt;0.01</b> | 178           | 1.03        | 0.79,1.34        | 0.85            | 178           | 1.05        | 0.79,1.38        | 0.75            |
| Sub cohort of girls with a BMI% ≥ the median N=351 | BMI% ≥ 65.73% |             |                  |                 | BMI% ≥ 67.57% |             |                  |                 | BMI% ≥ 67.28% |             |                  |                 |
| PFOA (ng/mL)                                       |               |             |                  |                 |               |             |                  |                 |               |             |                  |                 |
| Serum PFOA ≤4.9                                    | 104           | 1.00        | reference        | -               | 101           | 1.00        | reference        | -               | 109           | 1.00        | reference        | -               |
| 4.9<Serum PFOA ≤6.4                                | 98            | 1.20        | 0.89,1.61        | 0.23            | 100           | 1.15        | 0.85,1.56        | 0.38            | 94            | 1.00        | 0.73,1.36        | 0.98            |
| 6.4<Serum PFOA ≤8.55                               | 87            | 0.94        | 0.70,1.27        | 0.69            | 84            | 0.95        | 0.70,1.28        | 0.71            | 82            | 0.95        | 0.69,1.30        | 0.73            |

|                                    |            |             |                  |                 |            |             |                  |                 |            |             |                  |             |
|------------------------------------|------------|-------------|------------------|-----------------|------------|-------------|------------------|-----------------|------------|-------------|------------------|-------------|
| 8.55<Serum PFOA                    | 62         | 0.95        | 0.67,1.34        | 0.76            | 65         | 0.93        | 0.65,1.32        | 0.68            | 64         | 0.80        | 0.54,1.19        | 0.27        |
| BMIz closest to pubertal milestone | 351        | 1.15        | 0.96,1.38        | 0.13            | 350        | 1.06        | 0.88,1.28        | 0.54            | 349        | 1.24        | 1.01,1.52        | 0.04        |
| Race                               |            |             |                  |                 |            |             |                  |                 |            |             |                  |             |
| White                              | 157        | 1.00        | reference        | -               | 165        | 1.00        | reference        | -               | 153        | 1.00        | reference        | -           |
| Asian                              | 15         | 1.42        | 0.79,2.55        | 0.24            | 13         | 0.71        | 0.38,1.33        | 0.29            | 12         | 1.88        | 0.98,3.64        | 0.06        |
| Hispanic                           | 60         | 0.95        | 0.68,1.34        | 0.79            | 56         | 0.93        | 0.65,1.33        | 0.70            | 60         | 0.97        | 0.68,1.39        | 0.87        |
| Black                              | <b>119</b> | <b>1.85</b> | <b>1.42,2.41</b> | <b>&lt;0.01</b> | <b>116</b> | <b>2.49</b> | <b>1.89,3.28</b> | <b>&lt;0.01</b> | <b>124</b> | <b>1.43</b> | <b>1.07,1.92</b> | <b>0.02</b> |
| Maternal Age of Menarche           |            |             |                  |                 |            |             |                  |                 |            |             |                  |             |
| Before Age 12                      |            |             |                  |                 |            |             |                  |                 | <b>92</b>  | <b>1.42</b> | <b>1.07,1.89</b> | <b>0.01</b> |
| Between Age 12 and 14              |            |             |                  |                 |            |             |                  |                 | 200        | 1.00        | reference        | -           |
| After Age 14                       |            |             |                  |                 |            |             |                  |                 | 57         | 0.90        | 0.64,1.27        | 0.55        |
| Site                               |            |             |                  |                 |            |             |                  |                 |            |             |                  |             |
| Cincinnati                         | 175        | 1.00        | reference        | -               | 180        | 1.00        | reference        | -               | 180        | 1.00        | reference        | -           |
| San Francisco Bay Area             | 176        | <b>0.34</b> | <b>0.26,0.43</b> | <b>&lt;0.01</b> | 170        | 1.06        | 0.83,1.36        | 0.66            | 169        | 0.93        | 0.71,1.21        | 0.58        |

Note: For models in which the proportional hazards assumption failed, a time dependent covariate was included. BMIz from CDC 2000 tables. CI=confidence interval, BMI=body mass index, PFOA= perfluorooctanoic acid.



**Supplemental Table S5. Logistic regression model of the effect of PFOA on the odds of entering pubarche prior to thelarche for the girls in the study.**

|                                      | N   | Odds Ratio  | 95% CI           | p-value         |
|--------------------------------------|-----|-------------|------------------|-----------------|
| PFOA log transformed (ng/mL)         | 700 | <b>0.60</b> | <b>0.37,0.95</b> | <b>0.03</b>     |
| BMIz closest to first pubertal event | 700 | 0.90        | 0.75,1.07        | 0.23            |
| Race                                 |     |             |                  |                 |
| White                                | 363 | 1.00        | reference        | -               |
| Asian                                | 46  | <b>0.16</b> | <b>0.05,0.55</b> | <b>&lt;0.01</b> |
| Hispanic                             | 97  | 0.73        | 0.40,1.32        | 0.70            |
| Black                                | 194 | <b>1.64</b> | <b>1.06,2.56</b> | <b>&lt;0.01</b> |
| Site                                 |     |             |                  |                 |
| Cincinnati                           | 352 | 1.00        | reference        | -               |
| San Francisco Bay Area               | 348 | <b>2.30</b> | <b>1.52,3.47</b> | <b>&lt;0.01</b> |

Note: Pubarche 'prior to thelarche' is defined as either pubarche before or at the same age as thelarche. BMI% from CDC 2000 tables. CI= Confidence Interval, BMIz=body mass index. PFOA= perfluorooctanoic acid.

**Supplemental Table S6. Regression model of effects of PFOA serum concentrations on hormones stratified by median BMI% for the Cincinnati girls (n=304).**

|                                        | 6 months prior to thelarche |             | thelarche    |             | 6 months after thelarche |             | 12 months after thelarche |             |
|----------------------------------------|-----------------------------|-------------|--------------|-------------|--------------------------|-------------|---------------------------|-------------|
| Sub cohort of girls with BMI% < median | BMI% < 62.12                |             | BMI% < 68.35 |             | BMI % < 65.40            |             | BMI % < 64.75             |             |
|                                        | estimate                    | p-value     | estimate     | p-value     | estimate                 | p-value     | estimate                  | p-value     |
| Estradiol (pg/mL)                      | (n=100)                     |             | (n=105)      |             | (n=114)                  |             | (n=59)                    |             |
| PFOA (ng/mL)                           | -0.14                       | 0.29        | 0.17         | 0.23        | -0.17                    | 0.27        | 0.18                      | 0.52        |
| BMIz                                   | -0.16                       | 0.18        | -0.14        | 0.26        | -0.21                    | 0.17        | 0.15                      | 0.55        |
| race                                   | 0.07                        | 0.74        | 0.06         | 0.78        | 0.24                     | 0.34        | 0.51                      | 0.25        |
| Estrone (pg/mL)                        | (n=101)                     |             | (n=91)       |             | (n=114)                  |             | (n=59)                    |             |
| PFOA (ng/mL)                           | -0.09                       | 0.28        | -0.06        | 0.53        | -0.12                    | 0.20        | -0.04                     | 0.83        |
| BMIz                                   | -0.04                       | 0.62        | -0.10        | 0.23        | 0.03                     | 0.71        | 0.17                      | 0.28        |
| race                                   | 0.05                        | 0.69        | -0.18        | 0.21        | 0.05                     | 0.72        | 0.24                      | 0.37        |
| Testosterone (ng/dL)                   | (n=101)                     |             | (n=97)       |             | (n=120)                  |             | (n=75)                    |             |
| PFOA (ng/mL)                           | -0.07                       | 0.21        | -0.05        | 0.62        | 0.01                     | 0.87        | -0.02                     | 0.86        |
| BMIz                                   | -0.01                       | 0.92        | 0.08         | 0.31        | 0.02                     | 0.77        | 0.08                      | 0.39        |
| race                                   | -0.02                       | 0.90        | <b>-0.29</b> | <b>0.05</b> | -0.02                    | 0.99        | -0.12                     | 0.53        |
| DHEA-S (ug/dL)                         | (n=113)                     |             | (n=99)       |             | (n=127)                  |             | (n=75)                    |             |
| PFOA (ng/mL)                           | -0.21                       | 0.07        | 0.01         | 0.94        | 0.03                     | 0.73        | -0.01                     | 0.96        |
| <b>BMIz</b>                            | <b>0.23</b>                 | <b>0.02</b> | 0.09         | 0.39        | <b>0.26</b>              | <b>0.01</b> | <b>0.22</b>               | <b>0.03</b> |
| race                                   | -0.26                       | 0.17        | -0.27        | 0.19        | -0.07                    | 0.66        | -0.27                     | 0.22        |
| Sub cohort of girls with BMI% ≥ median | BMI% ≥ 62.12                |             | BMI% ≥ 68.35 |             | BMI % ≥ 65.40            |             | BMI % ≥ 64.75             |             |
| Estradiol (pg/mL)                      | (n=107)                     |             | (n=94)       |             | (n=109)                  |             | (n=56)                    |             |
| PFOA (ng/mL)                           | 0.08                        | 0.49        | -0.01        | 0.92        | 0.07                     | 0.71        | -0.02                     | 0.93        |
| BMIz                                   | -0.07                       | 0.58        | -0.01        | 0.94        | <b>-0.37</b>             | <b>0.03</b> | <b>-0.56</b>              | <b>0.01</b> |
| race                                   | 0.28                        | 0.09        | <b>0.42</b>  | <b>0.04</b> | <b>0.53</b>              | <b>0.01</b> | 0.17                      | 0.56        |

|                      |              |                 |              |             |              |             |        |      |
|----------------------|--------------|-----------------|--------------|-------------|--------------|-------------|--------|------|
| Estrone (pg/mL)      | (n=107)      |                 | (n=95)       |             | (n=108)      |             | (n=66) |      |
| PFOA (ng/mL)         | <b>-0.18</b> | <b>0.03</b>     | -0.17        | 0.08        | -0.21        | 0.16        | 0.00   | 0.99 |
| BMIz                 | 0.08         | 0.35            | 0.04         | 0.71        | -0.03        | 0.81        | -0.19  | 0.14 |
| race                 | 0.09         | 0.45            | 0.01         | 0.98        | 0.02         | 0.87        | 0.17   | 0.31 |
| Testosterone (ng/dL) | (n=105)      |                 | (n=93)       |             | (n=121)      |             | (n=67) |      |
| PFOA (ng/mL)         | <b>-0.24</b> | <b>0.03</b>     | -0.12        | 0.16        | <b>-0.21</b> | <b>0.02</b> | -0.15  | 0.34 |
| BMIz                 | 0.05         | 0.60            | 0.06         | 0.58        | -0.04        | 0.63        | -0.05  | 0.72 |
| race                 | -0.13        | 0.26            | -0.12        | 0.31        | -0.20        | 0.08        | -0.06  | 0.72 |
| DHEA-S (ug/dL)       | (n=108)      |                 | (n=98)       |             | (n=123)      |             | (n=66) |      |
| PFOA (ng/mL)         | <b>-0.35</b> | <b>&lt;0.01</b> | <b>-0.25</b> | <b>0.04</b> | -0.18        | 0.12        | -0.12  | 0.51 |
| BMIz                 | -0.00        | 0.98            | <b>0.32</b>  | <b>0.02</b> | -0.04        | 0.73        | -0.07  | 0.65 |
| race                 | 0.11         | 0.51            | -0.20        | 0.21        | -0.03        | 0.85        | 0.19   | 0.35 |

Note: All models control for race. 6 months prior to thelarche defined as 9 months prior to < -3 months prior to thelarche. Thelarche defined as 3 months prior to <3 months after thelarche. 6 months after thelarche defined as 3 months after thelarche to <9 months after thelarche. 12 months after thelarche defined as 9 months after thelarche to <15 months after thelarche. BMI%=body mass index percentile based on 2000 Center for Disease Control tables. PFOA=perfluorooctanoic acid. BMI=body mass index.
