# Supplementary material
Source: PubMed Central journal article supplement (PMC10521915)
Supplement: ehp11811.smcontents.508.pdf [file ehp11811.smcontents.508.pdf]

**Note to readers with disabilities:** *EHP* strives to ensure that all journal content is accessible to all readers. However, some figures and Supplemental Material published in *EHP* articles may not conform to [508 standards](#) due to the complexity of the information being presented. If you need assistance accessing journal content, please contact [ehp508@niehs.nih.gov](mailto:ehp508@niehs.nih.gov). Our staff will work with you to assess and meet your accessibility needs within 3 working days.

### **Supplemental Material**

#### **Exposure to Perfluoroalkyl Substances and Associations with Pubertal Onset and Serum Reproductive Hormones in a Longitudinal Study of Young Girls in Greater Cincinnati and the San Francisco Bay Area**

Susan M. Pinney, Cecily S. Fassler, Gayle C. Windham, Robert L. Herrick, Changchun Xie, Lawrence H. Kushi, and Frank M. Biro

#### **Table of Contents**

**Figure S1.** Number of study subjects.

**Table S1.** Inclusion Criteria.

**Table S2.** Characteristics of the girls in the puberty cohort not in this analysis and in the analysis.

**Table S3.** Pearson correlation coefficients of PFCs biomarkers levels with each other.

**Table S4.** Cox regression models of effects of PFOA serum concentration on time to pubertal event stratified by median BMI% for the girls in the study population.

**Table S5.** Logistic regression model of the effect of PFOA on the odds of entering pubarche prior to thelarche for the girls in the study.

**Table S6.** Regression model of effects of PFOA serum concentrations on hormones stratified by median BMI% for the Cincinnati girls (n=304).
